# Supplementary material for: How old are you, really? Communicating chronic risk through ‘effective age’ of your body and organs
Source: PubMed Central journal article supplement (PMC4974726; doi:10.1186/s12911-016-0342-z), 2016-08-05
Supplement: 12911_2016_342_MOESM1_ESM.pdf [file 12911_2016_342_MOESM1_ESM.pdf]

**Appendix to *How old are you, really? Communicating chronic risk through effective age of your body and organs*, by David Spiegelhalter**

Let  $T$  be the age at which an adverse event  $E$  happens to an individual. Let  $S(t; x)$  the survivor function at age  $t$  for someone with risk factors  $x$ , i.e.  $S(t; x) = P(T > t; x)$ , the probability that the adverse event in question has not occurred by age  $t$ .

Suppose the 'risk level'  $r$  of a person aged  $t_1$  with risk factors  $x_1$  is defined as the probability of the event first occurring to them within the next  $k$  years. so that

$$r = P(t_1 < T < t_1 + k | T > t_1; x) = \frac{P(t_1 < T < t_1 + k; x)}{P(T > t_1; x)} = \frac{S(t_1; x) - S(t_1 + k; x)}{S(t_1; x)}.$$

Suppose a 'healthy' person has risk factors  $x_0$ . Then the effective age  $t_0$  of the individual in question is the age at which a healthy person has risk  $r$  of experiencing the event in the next  $k$  years, and so, as before,

$$r = P(t_0 < T < t_0 + k | T > t_0; x_0) = \frac{P(t_0 < T < t_0 + k; x_0)}{P(T > t_0; x_0)} = \frac{S(t_0; x_0) - S(t_0 + k; x_0)}{S(t_0; x_0)},$$

and so

$$\frac{S(t_1; x_1) - S(t_1 + k; x_1)}{S(t_1; x_1)} = \frac{S(t_0; x_0) - S(t_0 + k; x_0)}{S(t_0; x_0)},$$

or equivalently

$$\frac{S(t_1 + k; x_1)}{S(t_1; x_1)} = \frac{S(t_0 + k; x_0)}{S(t_0; x_0)}. \quad (1)$$

Let  $h(t; x)$  be the hazard function at age  $t$  for an individual with risk factors  $x$ , where  $h$  is the instantaneous risk of  $E$  occurring given it has not occurred up to age  $t$ . Thus  $h(t; x) = p(t; x)/S(t; x)$ , the cumulative hazard  $H(t; x) = \int h = -\log S(t; x)$ , and so  $S(t; x) = e^{-H(t; x)}$ .

Equation (1) can therefore be written in terms of the cumulative hazard as

$$H(t_1 + k; x_1) - H(t_1; x_1) = H(t_0 + k; x_0) - H(t_0; x_0). \quad (2)$$

We now introduce the first assumption of proportional hazards, which means that the hazard function can be expressed as  $h(t; x) = h_0(t)e^{bx}$ , where  $h_0$  is a baseline hazard function, essentially that for  $x = 0$ . Thus  $H(t; x) = H_0(t)e^{bx}$  for a cumulative baseline hazard  $H_0$ .

Equation (2) becomes

$$(H_0(t_1 + k) - H_0(t_1)) e^{bx_1} = (H_0(t_0 + k) - H_0(t_0)) e^{bx_0}. \quad (3)$$

or equivalently

$$\log (H_0(t_0 + k) - H_0(t_0)) = \log (H_0(t_1 + k) - H_0(t_1)) + b(x_1 - x_0). \quad (4)$$

We now bring in the second assumption that the hazard is exponentially increasing, which we can express as  $h_0(t) = de^{ct}$ , the Gompertz equation. Then the proportional hazard assumption means that  $h(t; x) = de^{bx}e^{ct}$ , so the risk factors just have the effect of increasing the constant.

Given this assumption, we see that

$$H_0(t_1 + k) - H_0(t_1) = \int_{t_1}^{t_1+k} h_0(t)dt = d \int_{t_1}^{t_1+k} e^{ct} dt = \frac{d}{c}e^{ct_1} [e^{ck} - 1].$$

Substituting this in Equation (4) and cancelling terms gives

$$ct_1 = ct_0 + b(x_1 - x_0), \quad (5)$$

or equivalently

$$t_1 = t_0 + \frac{b}{c}(x_1 - x_0), \quad (6)$$

we immediately see that

- the lost years  $t_1 - t_0$  does not depend on the current age,
- the effective age  $t_1$  does not depend on  $k$ , and so the risk horizon is irrelevant.

We note that for binary exposures  $x_1 - x_0 = 1$ , and hence the 'years lost' is  $\frac{b}{c}$ : this is also the Rate Advancement Period. It can be estimated by fitting both the exposure and age as covariates in a Poisson regression, and then taking the ratio of their coefficients. Alternatively, in a Cox regression, exposure and age-at-entry can be fitted as covariates, and time-in-study used as the time variable.
